# Supplementary material
Source: publisher figshare collection journal article supplement (https://acs.figshare.com/ndownloader/files/4394536)
Supplement: Supplementary file 1 [file 4394536]

# Supporting Information

*Excited-state Triple-Proton Transfer in 7-Azaindole( $H_2O$ )<sub>2</sub> and Reaction Path Studied by Electronic Spectroscopy in the Gas Phase and Quantum Chemical Calculations*

<sup>1</sup>Kenji Sakota, <sup>2</sup>Christophe Jouvét\*, <sup>2</sup>Claude Dedonder, <sup>3</sup>Masaaki Fujii, <sup>1</sup>Hiroshi Sekiya\*

<sup>1</sup>Department of Chemistry, Faculty of Sciences, and Department of Molecular Chemistry, Graduate School of Science, Kyushu University, 6-10-1 Hakozaki, Higashi-ku, Fukuoka 812-8581, Japan

<sup>2</sup>Institut des Sciences Moléculaires d'Orsay and Centre Laser de L'université Paris Sud, Université Paris-Sud 11, 91405 Orsay Cedex, France

<sup>3</sup>Chemical Resources Laboratory, Tokyo Institute of Technology, 4259 Nagatsuta, Midori-ku, Yokohama 226-8503, Japan

(Received; March 00, 2010)

\*Corresponding author.

E-mail: [christophe.jouvet@u-psud.fr](mailto:christophe.jouvet@u-psud.fr), [sekiya@chem.kyushu-univ.jp](mailto:sekiya@chem.kyushu-univ.jp)

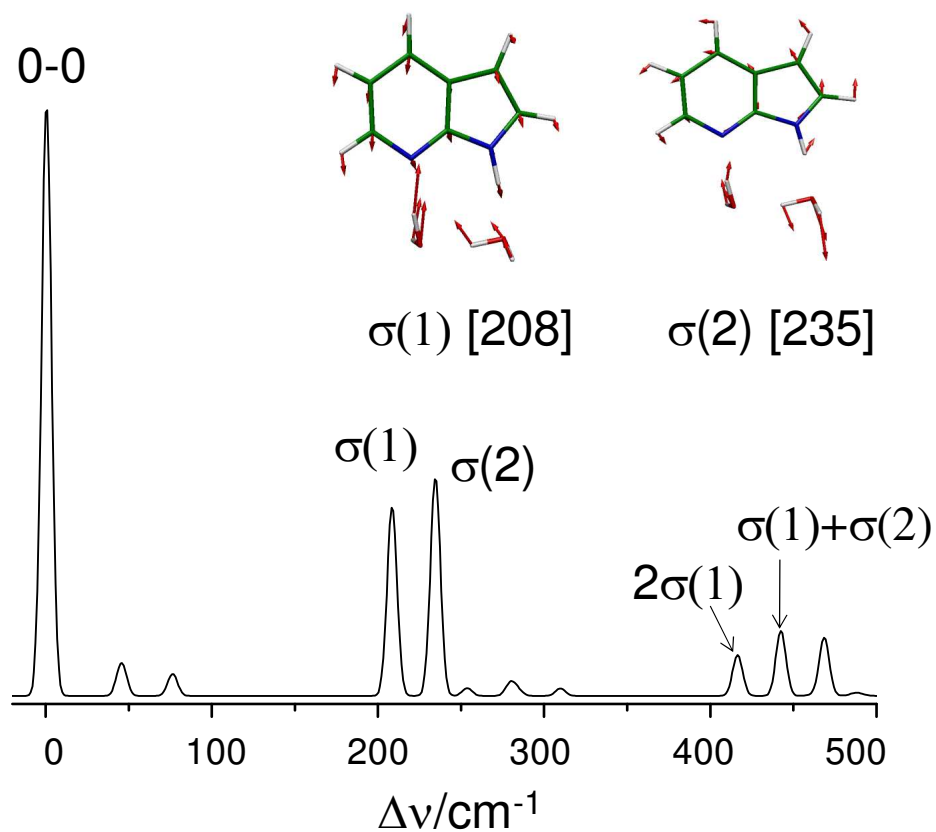

Figure SI

Figure SI The  $S_1-S_0$  electronic spectrum of the cyclic  $7\text{Al}(\text{H}_2\text{O})_2$  in the  $\Delta\nu=0-500\text{ cm}^{-1}$  region has been obtained by TD/DFT calculations using the cc-pVDZ basis set. The Franck-Condon analysis is carried out using the Pgopher software<sup>33</sup>. The displacements of two intermolecular modes  $\sigma(1)$  and  $\sigma(2)$  and their frequencies in units of  $\text{cm}^{-1}$  are inserted.
